# Supplementary material for: Aeromonas salmonicida subsp. salmonicida Early Infection and Immune Response of Atlantic Cod (Gadus morhua L.) Primary Macrophages
Source: PubMed Central journal article supplement (PMC6559310; doi:10.3389/fimmu.2019.01237), 2019-06-04
Supplement: Image_1.pdf [file Image_1.pdf]

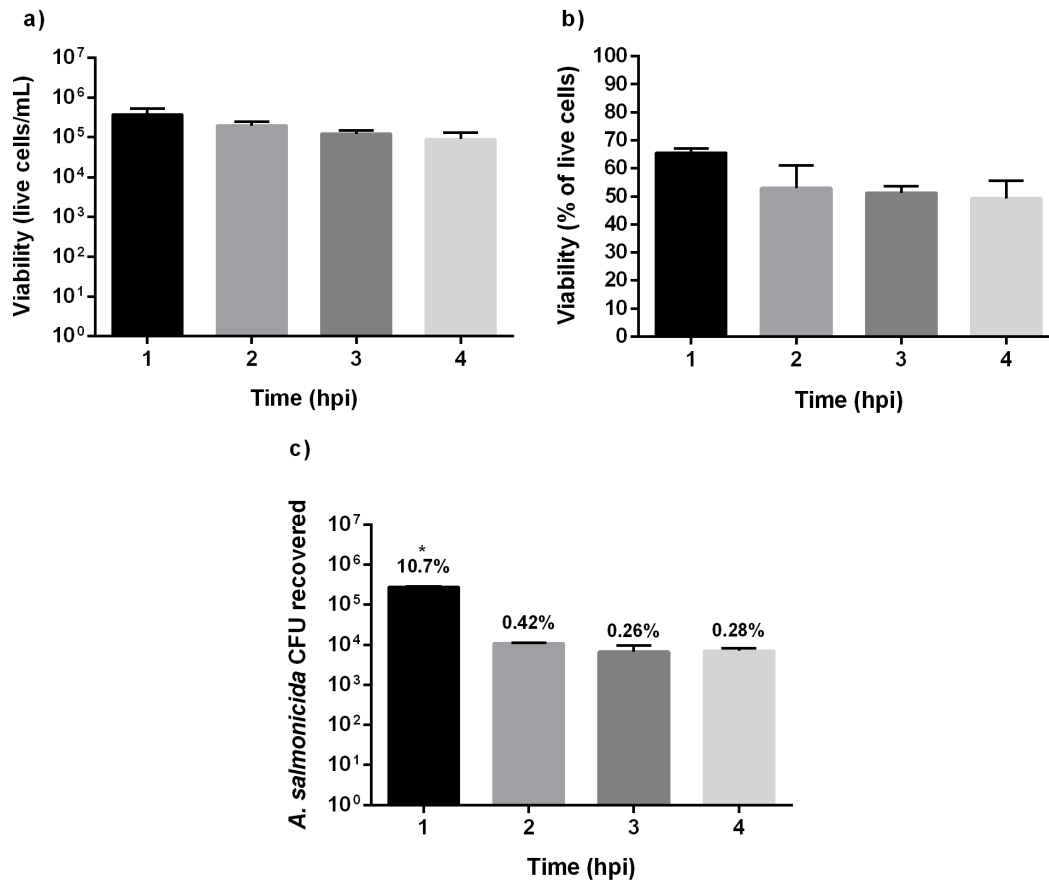

**Supplementary Figure 1.** Gentamicin exclusion assay in Atlantic salmon macrophages infected with *Aeromonas salmonicida* subsp. *salmonicida*. The figures show the number of live cells (a) and the percentage of viability (b), after 1, 2, 3 and 4 h post infection. The figure also shows the colony forming unit (c) recovered from cells during each time post infection. Each value is the mean ± S.E.M (n=3). Symbol (\*) indicate statistical differences between each time post infection. Percentage show above bars indicate the total % of attach (1 h post infection) and invasion (2, 3 and 4 h post invasion) of *A. salmonicida* to Atlantic salmon macrophages,  $P < 0.005$ . Procedures for Atlantic salmon husbandry and macrophage extraction are described in the supplementary data.
