# Supplementary material for: Aeromonas salmonicida subsp. salmonicida Early Infection and Immune Response of Atlantic Cod (Gadus morhua L.) Primary Macrophages
Source: PubMed Central journal article supplement (PMC6559310; doi:10.3389/fimmu.2019.01237), 2019-06-04
Supplement: Image_2.pdf [file Image_2.pdf]

## PBS

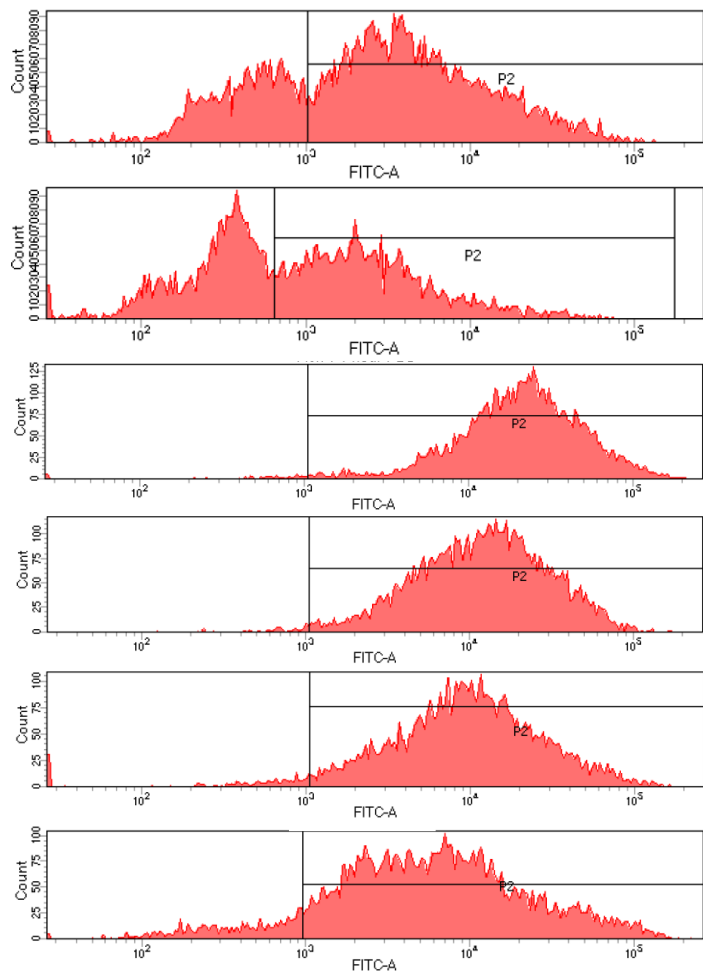

## PMA

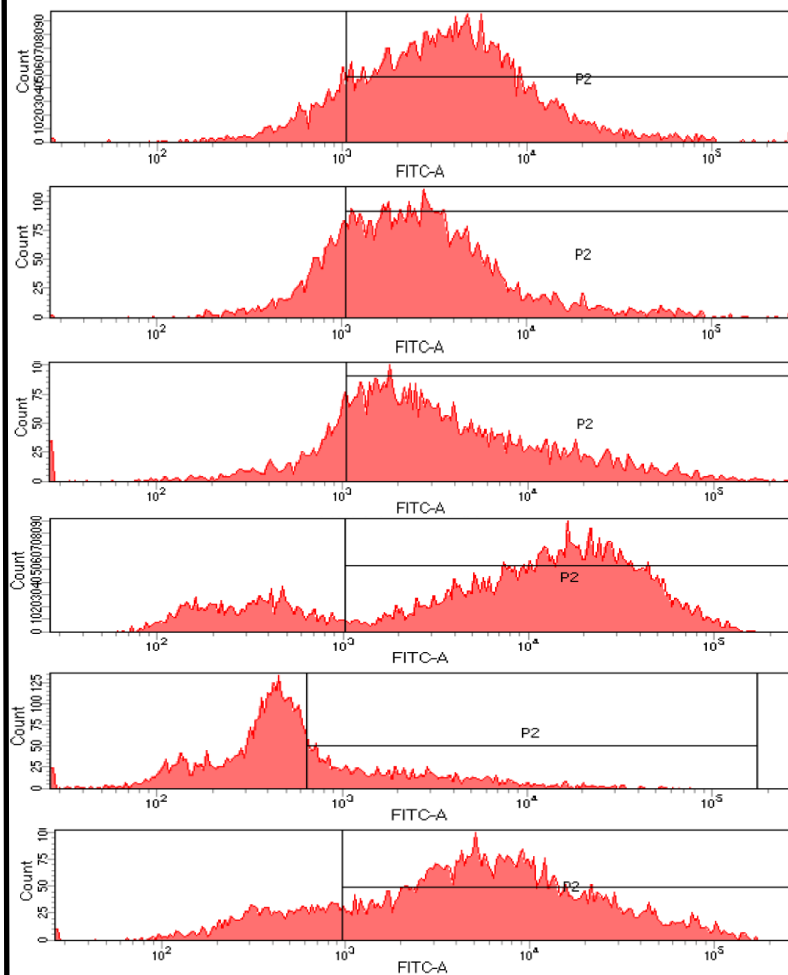

## PBS + *A. salmonicida*

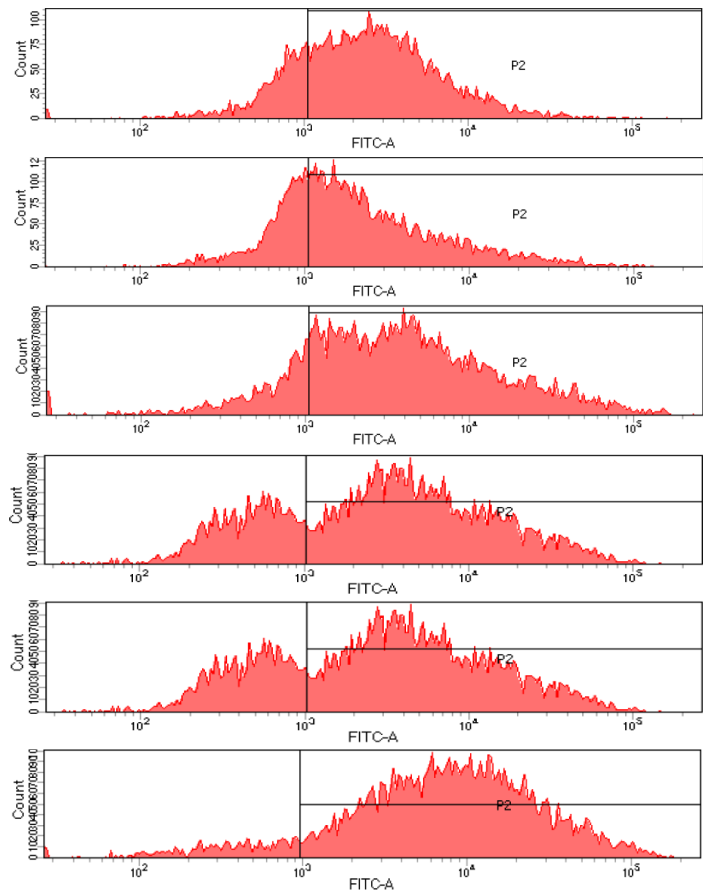

## PMA + *A. salmonicida*

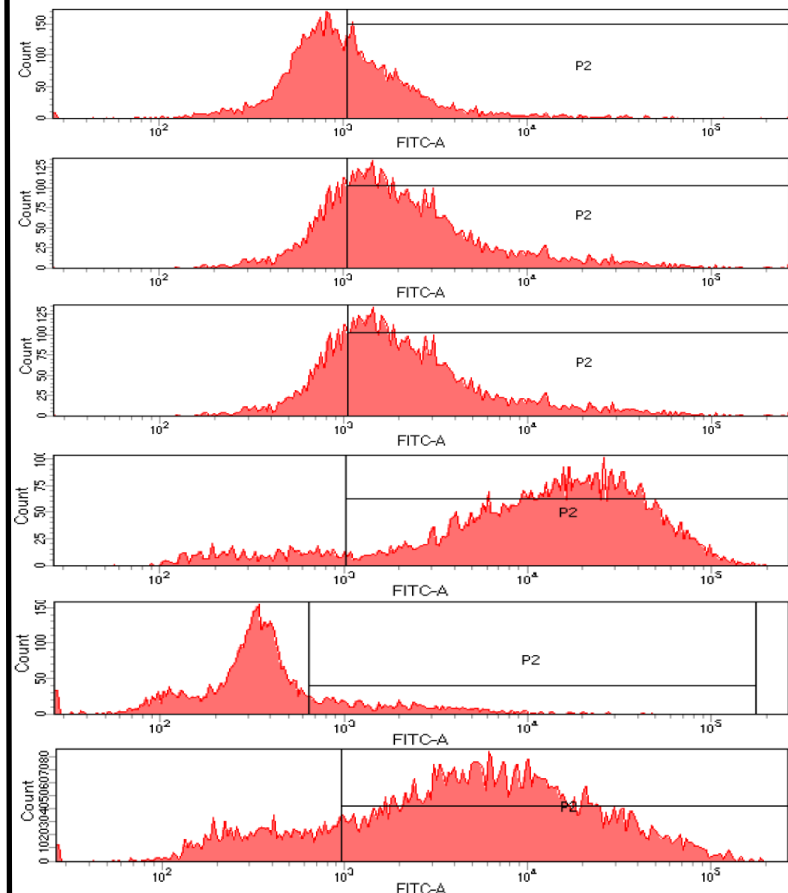

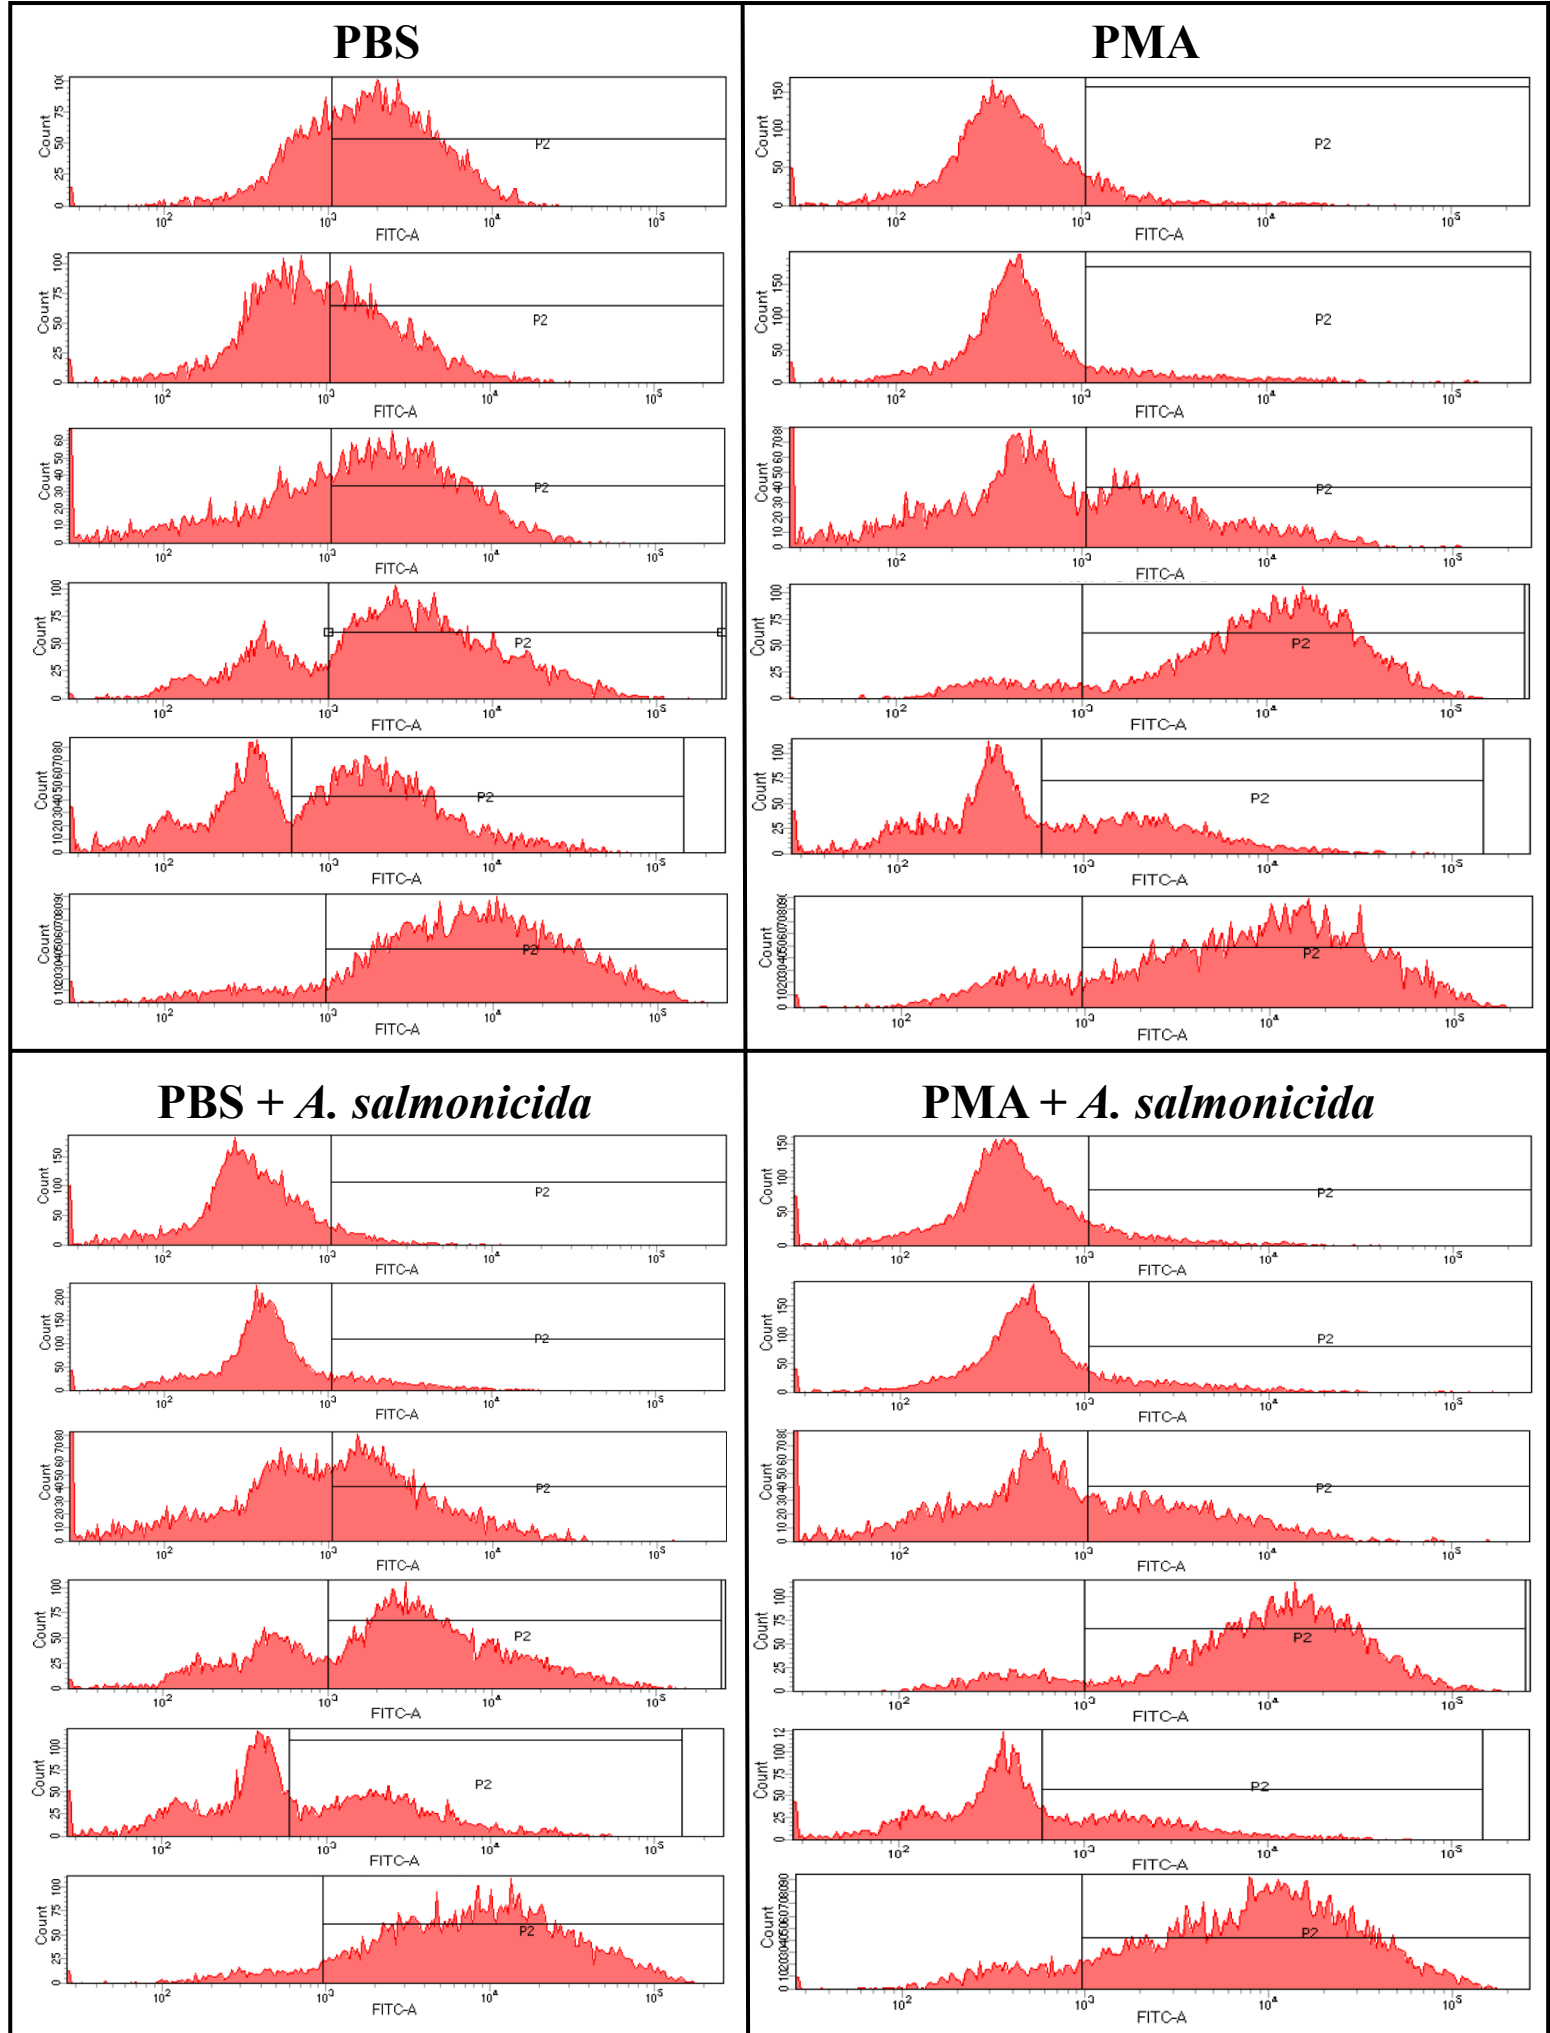

**Supplementary Figure 2.** Fluorescence histograms of ROS production in Atlantic cod primary macrophages 6 h post-inoculation with PBS (negative control), PMA (positive control), PBS + *A. salmonicida*, and PMA + *A. salmonicida* (n=6).
